# Supplementary material
Source: publisher figshare collection journal article supplement (https://asha.figshare.com/articles/dataset/_/23148647)
Supplement: Supplementary file 1 [file 1]

### Supplemental Material S3. Example of predictive inference task stimuli.

| Distant                                                              | Recent                                                               | Control                                                              |
|----------------------------------------------------------------------|----------------------------------------------------------------------|----------------------------------------------------------------------|
| 1) Mary had spent the day organizing her new desk (Setting).         | 1) Jill had spent the day organizing her new desk (Setting).         | 1) Susan had spent the day organizing her new desk (Setting).        |
| 2) She took out a piece of paper and a pen (Predictive).             | 2) She wanted to let her brother know about her promotion (Setting). | 2) She wanted to let her brother know about her promotion (Setting). |
| 3) She wanted to let her brother know about her promotion (Setting). | 3) Jill knew he would be happy for her (Setting).                    | 3) Susan knew he would be happy for her (Setting).                   |
| 4) Mary knew he would be happy for her (Setting).                    | 4) She took out a piece of paper and a pen (Predictive).             | 4) Susan called her brother and told him all about her new position. |
| Question: How did _____ let her brother know about her promotion?    |                                                                      |                                                                      |
