# Supplementary material
Source: publisher figshare collection journal article supplement (https://asha.figshare.com/articles/dataset/_/23148647)
Supplement: Supplementary file 2 [file 1]

## Supplemental Material S2. Examples of working memory updating tasks.

### Verbal (numeric) version

|   |  |  |
|---|--|--|
|   |  |  |
| 7 |  |  |
|   |  |  |

Stimuli

|    |  |  |
|----|--|--|
|    |  |  |
| -5 |  |  |
|    |  |  |

Numerical Operations

|  |  |    |
|--|--|----|
|  |  |    |
|  |  | +2 |
|  |  |    |

Probe

The correct response for the probe in the verbal version above is 6 (4 is the starting value and +2 is the numerical operation in the probe cell).

### Nonverbal (spatial) version

|   |  |  |
|---|--|--|
|   |  |  |
| • |  |  |
|   |  |  |

Stimuli

|   |  |  |
|---|--|--|
|   |  |  |
| ↑ |  |  |
|   |  |  |

Directional Operations

|  |  |   |
|--|--|---|
|  |  |   |
|  |  | → |
|  |  |   |

Probe

The correct response for the probe in the nonverbal version above is a dot in the upper right corner of the cell (the upper middle position is the starting position of the dot and the directional arrow to the right indicates a movement one position to the right). Responses were indicated using a number pad that had a dot on each pad (instead of a number), corresponding to each position in the cell.
