# Supplementary material
Source: publisher figshare collection journal article supplement (https://asha.figshare.com/articles/dataset/_/23148647)
Supplement: Supplementary file 3 [file 1]

# **Supplemental Material S1. Injury-related characteristics of participants with traumatic brain injury.**

| Participant | Time post-onset | GCS | LOC     | PTA      | LCFS | GOAT   | Cause of injury and injury characteristics          |
|-------------|-----------------|-----|---------|----------|------|--------|-----------------------------------------------------|
| 1           | 43              | 3   | 7 days  | 42 days  | 10   | 100    | MVA – R frontal SAH                                 |
| 2           | 86              | 5   | 21 days | 120 days | 7    | 85     | MVA – L frontal & R temporal contusions             |
| 3           | 213             | NA  | 5 days  | None     | 10   | 100    | MVA – NS                                            |
| 4           | 134             | 6   | 28 days | 150 days | 7    | 88     | Unintentional blunt trauma – R frontal & R parietal |
| 5           | 41              | 4   | 10 days | 63 days  | 9    | 95     | MVA – NS                                            |
| 6           | 16              | NA  | None    | None     | 10   | 100    | Unintentional blunt trauma – NS                     |
| 7           | 9               | NA  | Yes, NS | 35 days  | 10   | 100    | MVA – NS                                            |
| 8           | 45              | NA  | 42 days | 365 days | 7    | 95     | MVA – hematoma, location NS                         |
| 9           | 15              | 14  | < 1 hr  | 4 days   | 9    | 100    | Fall – R SAH, L epidural hematoma                   |
| 10          | 82              | 13  | 5 min   | 8 days   | 9    | 99     | MVA – R contusion, bifrontal SAH                    |
| 11          | 10              | 3   | 10 days | 21 days  | 8    | 100    | MVA – R hematoma, R SDH                             |
| 12          | 210             | NA  | < 24 hr | 30 days  | 10   | 100    | Assault – L occipital subarachnoid contusion        |
| 13          | 6               | 15  | None    | < 24 hr  | 8    | 100    | Fall – R epidural hematoma & SDH                    |
| 14          | 364             | NA  | 90 days | None     | 9    | 100    | MVA – frontal                                       |
| 15          | 9               | NA  | 26 days | None     | 9    | 100    | Assault – NS                                        |
| 16          | 5               | NA  | None    | None     | 10   | 99     | Fall – NS                                           |
| 17          | 11              | NA  | < 5 min | < 24 hr  | 10   | 100    | Unintentional blunt trauma – R frontal contusion    |
| 18          | 383             | NA  | 48 days | None     | 7    | 100    | MVA – NS                                            |
| 19          | 5               | NA  | < 5 min | None     | 9    | 95     | MVA – NS                                            |
| 20          | 7               | NA  | < 1 min | None     | 10   | 99     | MVA – NS                                            |
| 21          | 471             | NA  | 4 days  | None     | 10   | 95     | MVA – NS                                            |
| Range       | 5–471           |     |         |          | 7–10 | 85–100 |                                                     |
| Mean        | 103.10          |     |         |          | 8.95 | 97.62  |                                                     |

*Note.* GCS = Glasgow Coma Scale (Teasdale & Jennett, 1974); LOC = Loss of consciousness; PTA = duration of post-traumatic amnesia; LCFS = Ranchos Los Amigos Level of Cognitive Functioning Scale–Revised (Hagen, 1998); NA = not available; NS = not specified; L = left; R = right; MVA = motor vehicle accident; SAH = subarachnoid hemorrhage; SDH = subdural hemorrhage.
